# Supplementary material for: Acute ecotoxicology of natural oil and gas condensate to coral reef larvae
Source: PubMed Central journal article supplement (PMC4759697; doi:10.1038/srep21153), 2016-02-19
Supplement: srep21153-s1.pdf [file srep21153-s1.pdf]

## Supplementary Information

### Acute ecotoxicology of natural oil and gas condensate to coral reef larvae

Andrew P. Negri, Diane L. Brinkman, Florita Flores, Emmanuelle S. Botté, Ross J. Jones, Nicole S. Webster

**Table S1.** Concentrations of BTEXs, PAHs and alkyl PAHs in stabilised condensate determined using GC-MS. Concentrations are expressed as mg kg<sup>-1</sup> unless otherwise indicated.

| Analyte                                    | mg kg <sup>-1</sup> |
|--------------------------------------------|---------------------|
| benzene                                    | 2500                |
| toluene                                    | 12000               |
| ethylbenzene                               | 1300                |
| <i>m,p</i> -xylene                         | 11000               |
| <i>o</i> -xylene                           | 1400                |
| naphthalene                                | 630                 |
| C1-alkylnaphthalenes                       | 1960                |
| C2-alkylnaphthalenes                       | 2100                |
| C3-alkylnaphthalenes                       | 1200                |
| C4-alkylnaphthalenes                       | <500                |
| acenaphthylene                             | <50                 |
| acenaphthene                               | <50                 |
| fluorene                                   | 60                  |
| dibenzothiophene (DBT)                     | <50                 |
| C1-alkylDBTs                               | <500                |
| C2-alkylDBTs                               | <500                |
| C3-alkylDBTs                               | <500                |
| phenanthrene                               | 50                  |
| anthracene                                 | <50                 |
| C1-alkylphenanthrenes                      | <500                |
| C2-alkylphenanthrenes                      | <500                |
| C3-alkylphenanthrenes                      | <500                |
| fluoranthene                               | <50                 |
| pyrene                                     | <50                 |
| C1-alkylpyrenes/fluoranthenes              | <500                |
| C2-alkylpyrenes/fluoranthenes              | <500                |
| C3-alkylpyrenes/fluoranthenes              | <500                |
| benz(a)anthracene                          | <50                 |
| chrysene                                   | <50                 |
| C1-alkylbenz(a)anthracenes/chrysenes       | <500                |
| C2-alkylbenz(a)anthracenes/chrysenes       | <500                |
| benzo(b+k)fluoranthene                     | <50                 |
| benzo(a)pyrene                             | <50                 |
| C1-alkylbenzopyrenes                       | <500                |
| C2-alkylbenzopyrenes                       | <500                |
| indeno(1,2,3-cd)pyrene                     | <50                 |
| dibenz(a,h)anthracene                      | <50                 |
| benzo(ghi)perylene                         | <50                 |
| Σ BTEXs (g kg <sup>-1</sup> )              | 28.2                |
| Σ PAHs (g kg <sup>-1</sup> )               | 6.0                 |
| TPAH (Σ BTEX + Σ PAH; g kg <sup>-1</sup> ) | 34.2                |

**Table S2.** Concentrations of BTEXs, PAHs, alkyl PAHs and TRH in solvent-extracted 100% condensate WAFs used for the coral and sponge larvae experiments determined by GC-MS. Concentrations are expressed as  $\mu\text{g l}^{-1}$ .

| Analyte                              | Coral | Sponge |
|--------------------------------------|-------|--------|
| benzene                              | 4500  | 6967   |
| toluene                              | 6100  | 17000  |
| ethylbenzene                         | 140   | 360    |
| <i>m,p</i> -xylene                   | 1300  | 2867   |
| <i>o</i> -xylene                     | 680   | 650    |
| naphthalene                          | 87    | 105    |
| C1-alkylnaphthalenes                 | 68    | 90     |
| C2-alkylnaphthalenes                 | <0.5  | 29     |
| C3-alkylnaphthalenes                 | <0.5  | <0.5   |
| C4-alkylnaphthalenes                 | <0.5  | <0.5   |
| acenaphthylene                       | <0.1  | <0.1   |
| acenaphthene                         | <0.1  | <0.1   |
| fluorene                             | 1     | <0.1   |
| dibenzothiophene (DBT)               | <0.1  | <0.1   |
| C1-alkylDBTs                         | <0.5  | <0.5   |
| C2-alkylDBTs                         | <0.5  | <0.5   |
| C3-alkylDBTs                         | <0.5  | <0.5   |
| phenanthrene                         | 1     | <0.1   |
| anthracene                           | <0.1  | <0.1   |
| C1-alkylphenanthrenes                | <0.5  | <0.5   |
| C2-alkylphenanthrenes                | <0.5  | <0.5   |
| C3-alkylphenanthrenes                | <0.5  | <0.5   |
| fluoranthene                         | <0.1  | <0.1   |
| pyrene                               | <0.1  | <0.1   |
| C1-alkylpyrenes/fluoranthenes        | <0.5  | <0.5   |
| C2-alkylpyrenes/fluoranthenes        | <0.5  | <0.5   |
| C3-alkylpyrenes/fluoranthenes        | <0.5  | <0.5   |
| benz(a)anthracene                    | <0.1  | <0.1   |
| chrysene                             | <0.1  | <0.1   |
| C1-alkylbenz(a)anthracenes/chrysenes | <0.5  | <0.5   |
| C2-alkylbenz(a)anthracenes/chrysenes | <0.5  | <0.5   |
| benzo(b+k)fluoranthene               | <0.1  | <0.1   |
| benzo(a)pyrene                       | <0.1  | <0.1   |
| C1-alkylbenzopyrenes                 | <0.5  | <0.5   |
| C2-alkylbenzopyrenes                 | <0.5  | <0.5   |
| indeno(1,2,3-cd)pyrene               | <0.1  | <0.1   |
| dibenz(a,h)anthracene                | <0.1  | <0.1   |
| benzo(ghi)perylene                   | <0.1  | <0.1   |
| $\Sigma$ BTEX                        | 12720 | 27843  |
| $\Sigma$ PAH                         | 157   | 224    |
| TPAH ( $\Sigma$ BTEX + $\Sigma$ PAH) | 12877 | 28067  |

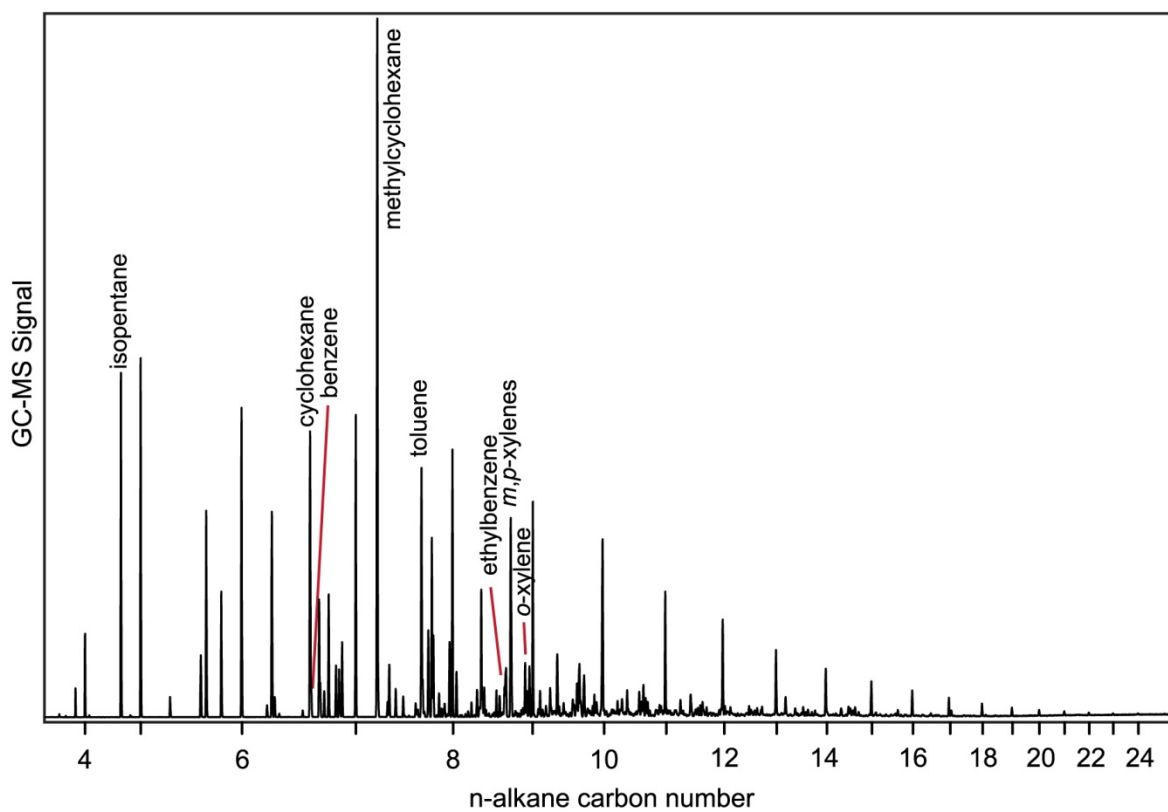

**Figure S1.** GC-MS chromatogram of stabilised condensate (direct injection). On the x-axis, retention time has been converted to n-alkane carbon number.

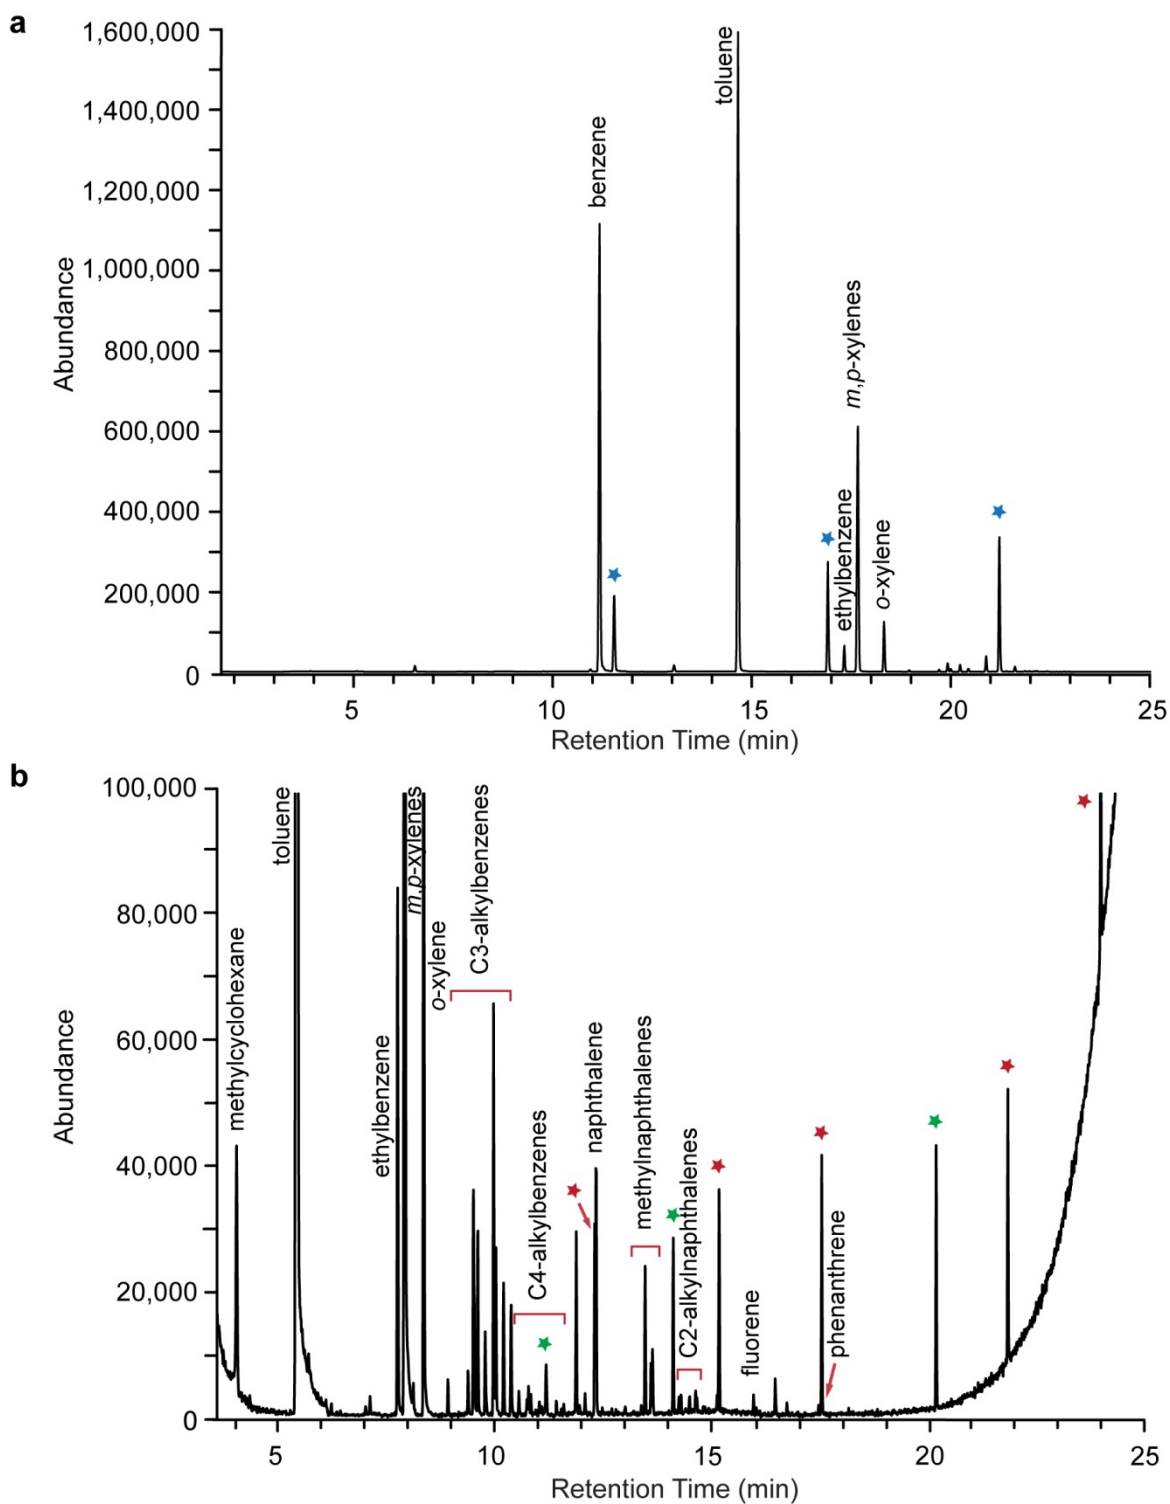

**Figure S2.** Chromatograms of condensate WAF used in coral exposures. a) Purge and trap GC-MS (SIM) for quantification of BTEXs; and b) flash vaporization GC-MS (full scan) for quantification of PAHs and alkyl-substituted PAHs (alkylbenzenes and methylcyclohexane are also indicated but were not quantified). Internal ( $\star$ ,  $\star$ ) and surrogate ( $\star$ ) standards are listed in order of elution:  $\star$  = chlorobenzene- $d_5$ , 2-fluorobenzene and 1,4-dichlorobenzene- $d_4$ ;  $\star$  = naphthalene- $d_8$ , acenaphthene- $d_{10}$ , phenanthrene- $d_{10}$ , chrysene- $d_{12}$  and perylene- $d_{12}$ ;  $\star$  = nitrobenzene- $d_5$ , 2-fluorobiphenyl and *p*-terphenyl- $d_{14}$ .
